# Supplementary material
Source: PubMed Central journal article supplement (PMC8366558)

**A**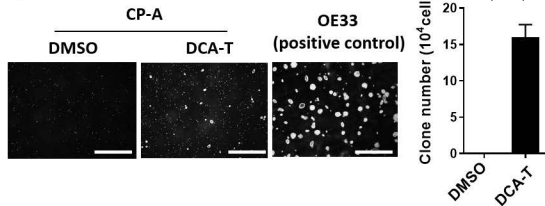**B**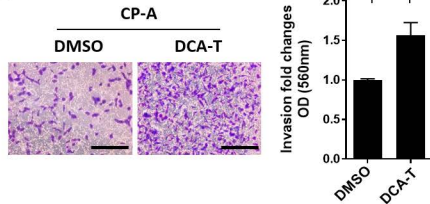**C**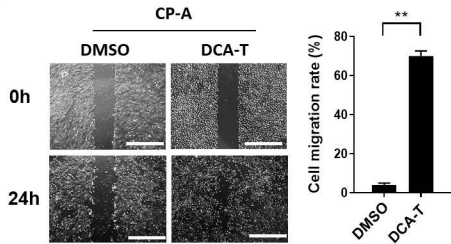**D**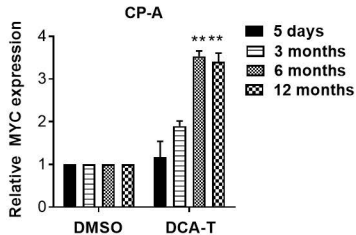

Supplement: NIHMS1713939-supplement-Supple_fig_1.pdf [file NIHMS1713939-supplement-Supple_fig_1.pdf]

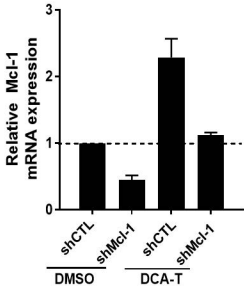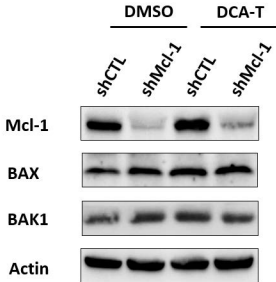

Supplement: NIHMS1713939-supplement-Supple_fig_10.pdf [file NIHMS1713939-supplement-Supple_fig_10.pdf]

A

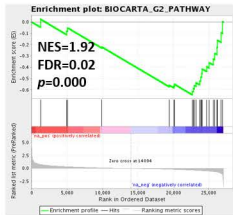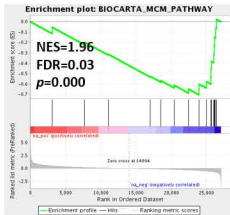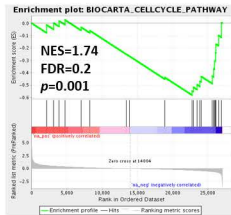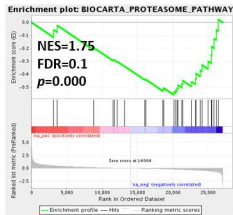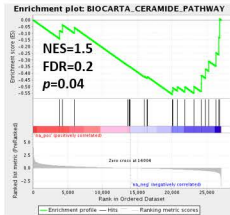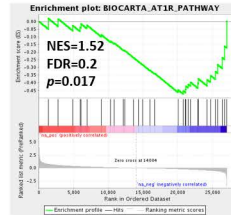

B

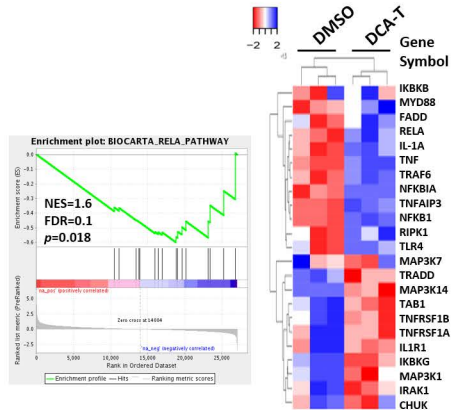

Supplement: NIHMS1713939-supplement-Supple_fig_11.pdf [file NIHMS1713939-supplement-Supple_fig_11.pdf]

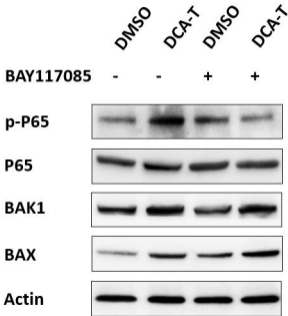

Supplement: NIHMS1713939-supplement-Supple_fig_12.pdf [file NIHMS1713939-supplement-Supple_fig_12.pdf]

A

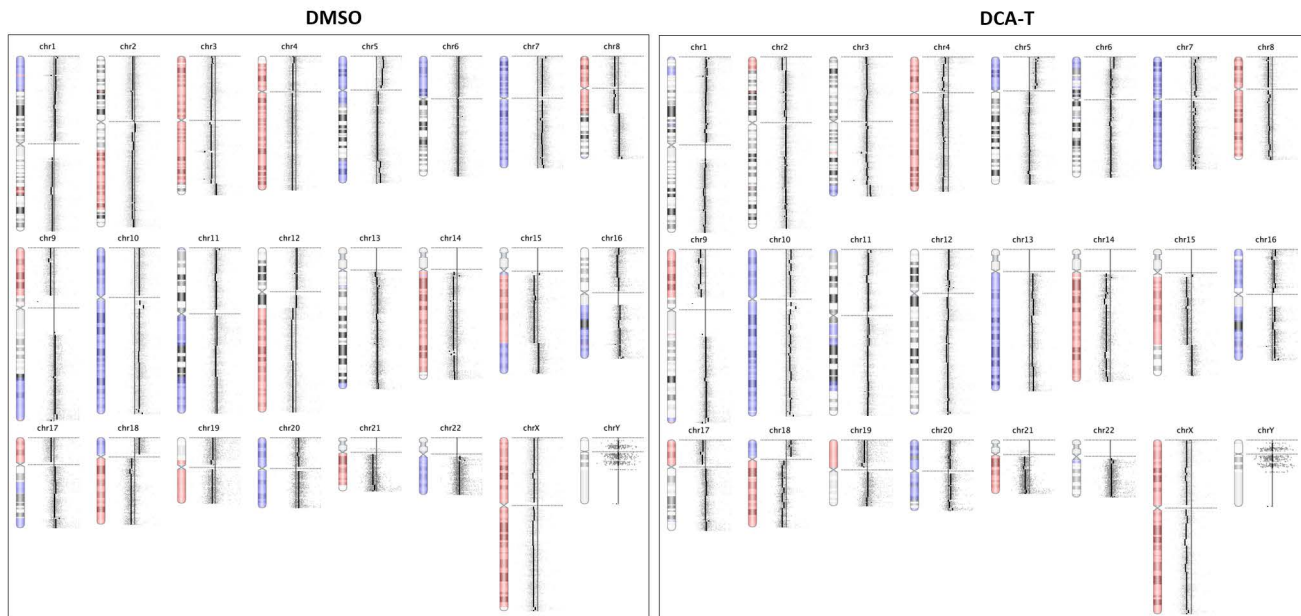

B

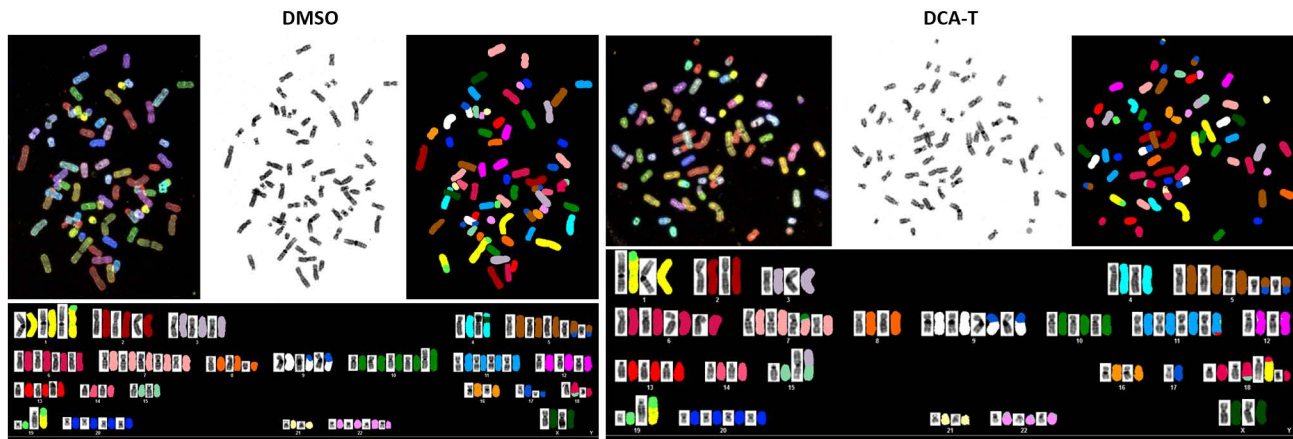

Supplement: NIHMS1713939-supplement-Supple_fig_2.pdf [file NIHMS1713939-supplement-Supple_fig_2.pdf]

**A**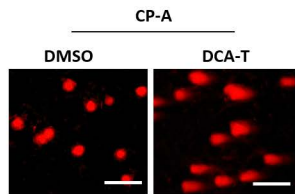

OpenComet scoring

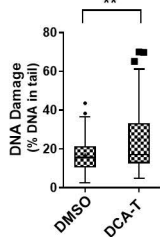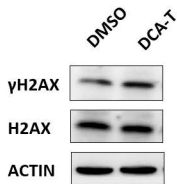**D**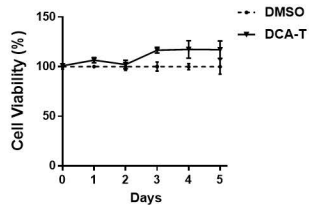**B**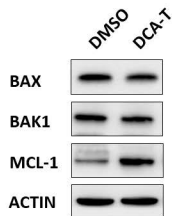**C**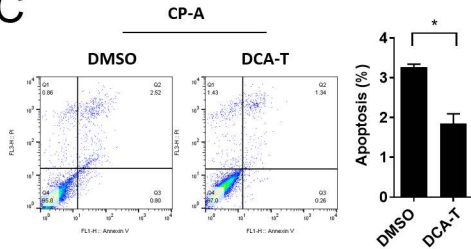**E**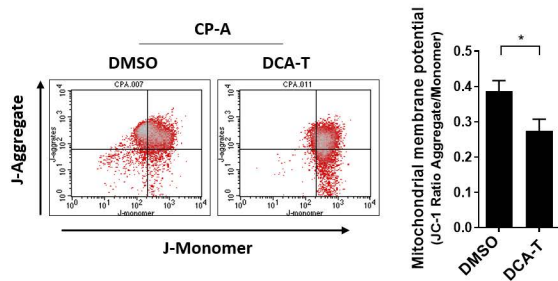**F**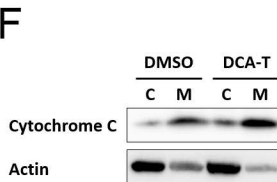**G**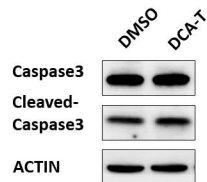

Supplement: NIHMS1713939-supplement-Supple_fig_3.pdf [file NIHMS1713939-supplement-Supple_fig_3.pdf]

**A**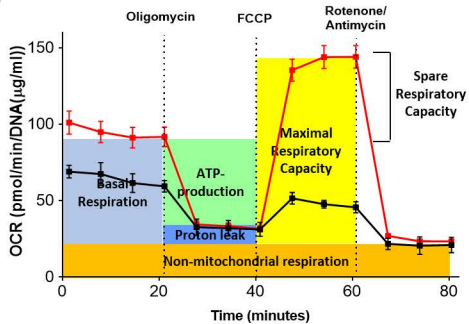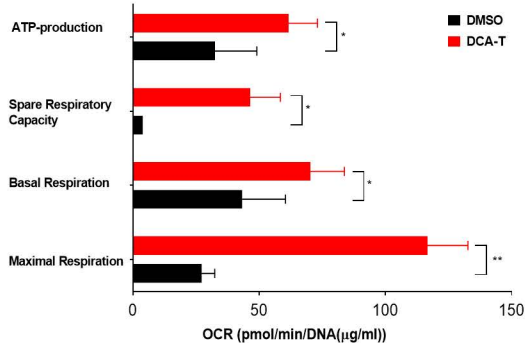**B**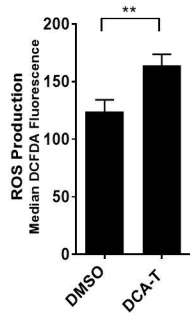

Supplement: NIHMS1713939-supplement-Supple_fig_4.pdf [file NIHMS1713939-supplement-Supple_fig_4.pdf]

**A**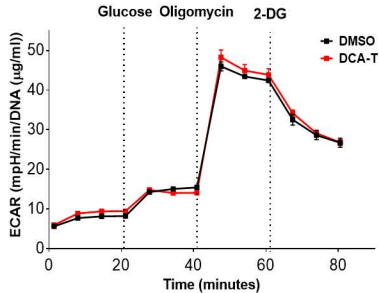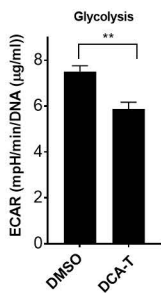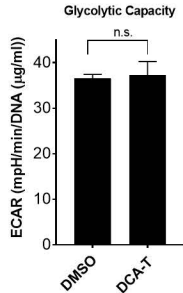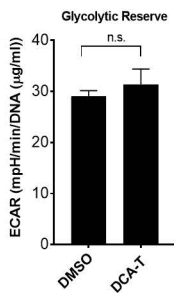**B**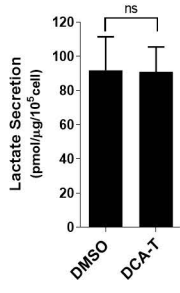

Supplement: NIHMS1713939-supplement-Supple_fig_5.pdf [file NIHMS1713939-supplement-Supple_fig_5.pdf]

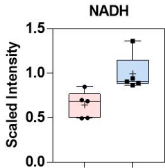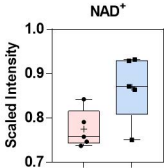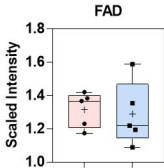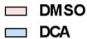

Supplement: NIHMS1713939-supplement-Supple_fig_6.pdf [file NIHMS1713939-supplement-Supple_fig_6.pdf]

**A**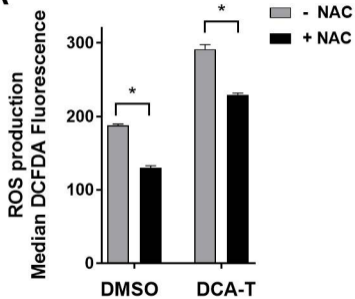**B**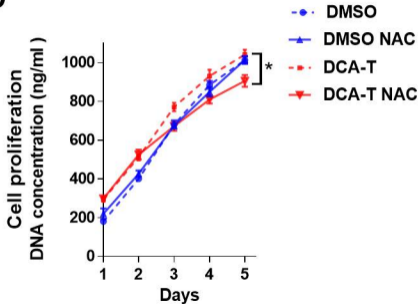

Supplement: NIHMS1713939-supplement-Supple_fig_7.pdf [file NIHMS1713939-supplement-Supple_fig_7.pdf]

**A**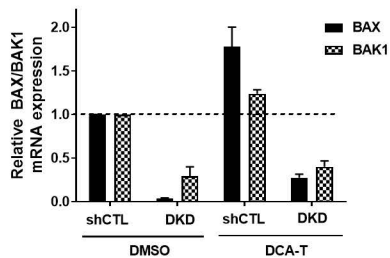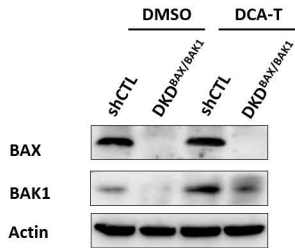**B**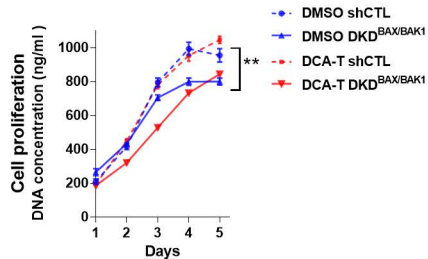**C**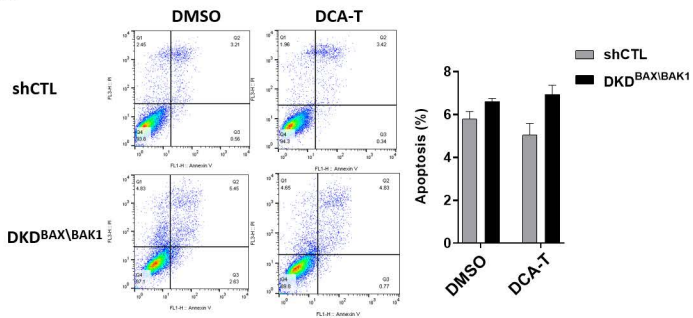**D**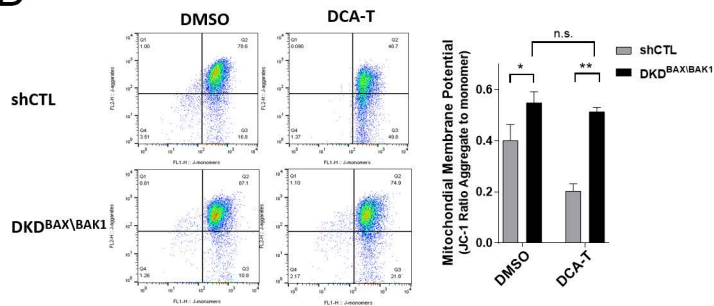

Supplement: NIHMS1713939-supplement-Supple_fig_8.pdf [file NIHMS1713939-supplement-Supple_fig_8.pdf]

**A**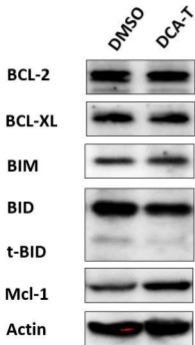**B**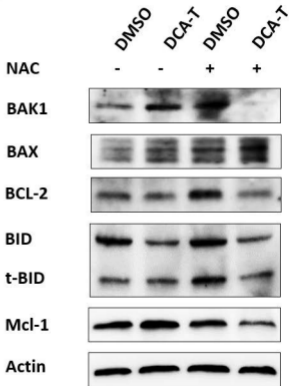

Supplement: NIHMS1713939-supplement-Supple_fig_9.pdf [file NIHMS1713939-supplement-Supple_fig_9.pdf]
